# Supplementary material for: Defect passivation of SnO2 doped with 2-FN for high-performance perovskite detectors
Source: Royal Society of Chemistry journal article supplement (doi:10.1039/d4tc04025b), 2025-01-01
Supplement: d4tc04025b1.pdf [file d4tc04025b1.pdf]

# Supporting Information

## Defect Passivation of SnO<sub>2</sub> Doped with 2-FN for High-Performance Perovskite Detectors

Zuhuan Lu<sup>a</sup>, Yukun Wang<sup>a\*</sup>, Jing Zhang<sup>a</sup>, Xujianeng Du<sup>a</sup>, Wenhong Sun<sup>a,b,c,d\*</sup>

<sup>a</sup> Research Center for Optoelectronic Materials and Devices, Guangxi Key Laboratory for the Relativistic Astrophysics, School of Physical Science and Technology, Guangxi University, Nanning, 530004, China.

<sup>b</sup> State Key Laboratory of Featured Metal Materials and Life-cycle Safety for Composite Structures, Guangxi University, Nanning 530004, China

<sup>c</sup> MOE Key Laboratory of New Processing Technology for Nonferrous Metals and the Guangxi Key of Processing for Non-ferrous Metals and Featured Materials, Guangxi University, Nanning 530004 Guangxi, P. R. China.

<sup>d</sup> Third Generation Semiconductor Industry Research Institute, Guangxi University, Nanning 530004, China.

\*Correspondence: ykwang0929@163.com (Y. Wang), 20180001@gxu.edu.cn (W. Sun).

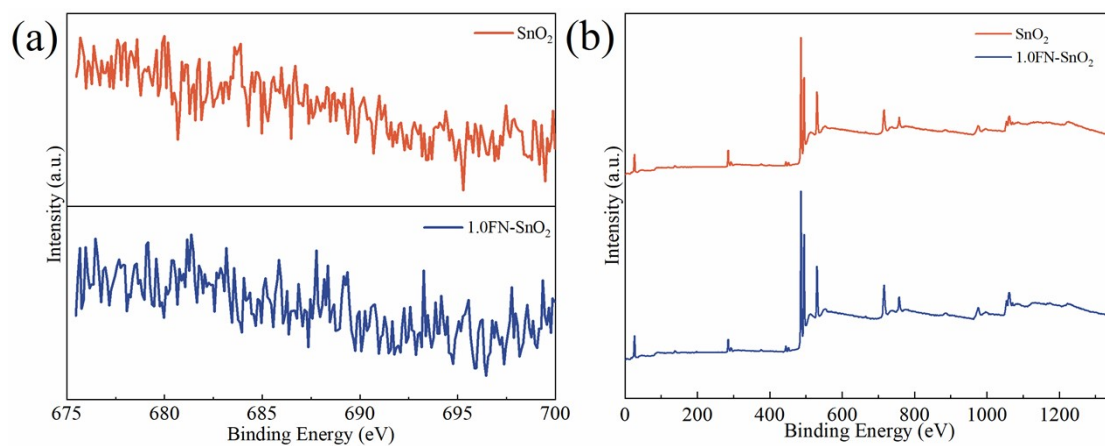

**Fig. S1** (a). F 1s orbital XPS spectra. (b). Full XPS spectrum of SnO<sub>2</sub> and 1.0 FN-SnO<sub>2</sub>.

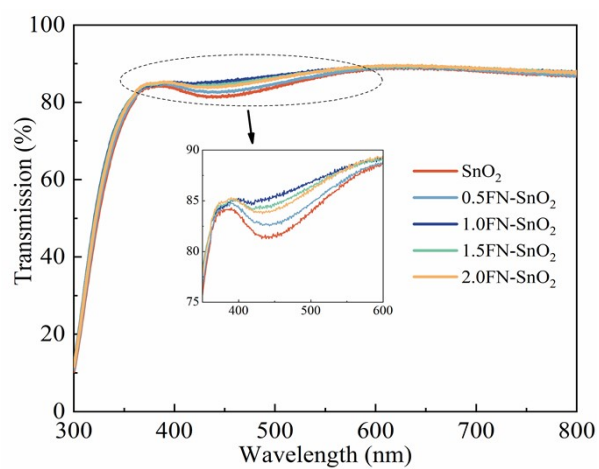

**Fig. S2** Transmission spectra of SnO<sub>2</sub> and FN-SnO<sub>2</sub>.

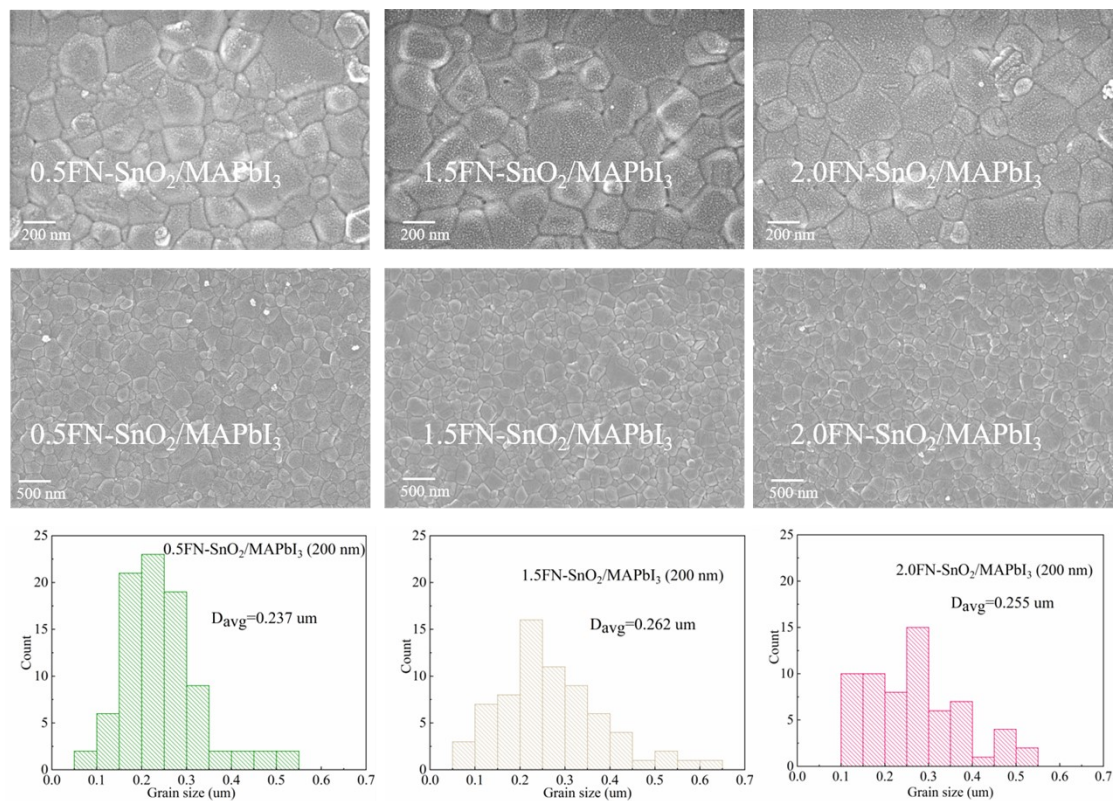

**Fig. S3** SEM image of FN-SnO<sub>2</sub>/MAPbI<sub>3</sub> and perovskite grain size statistics.

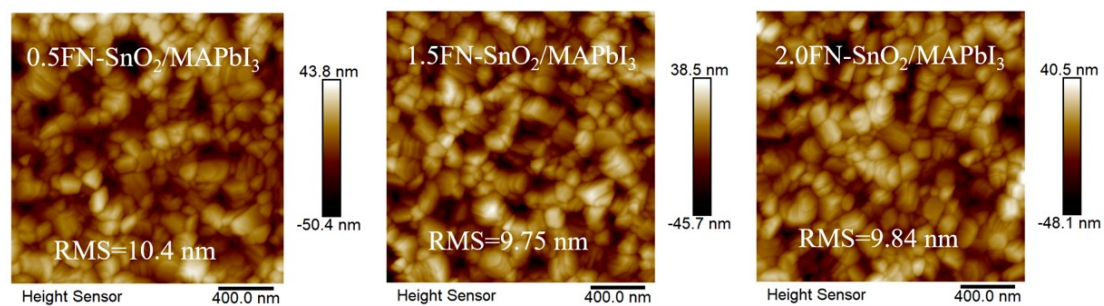

**Fig. S4** AFM images of FN-SnO<sub>2</sub>/MAPbI<sub>3</sub>.

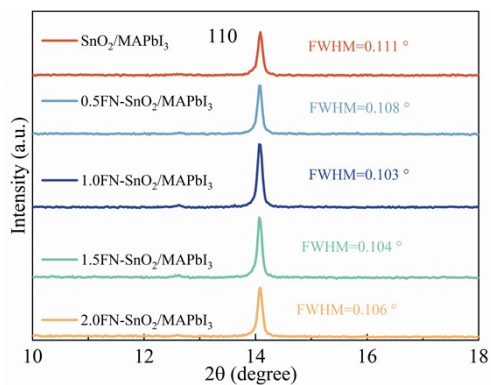

**Fig. S5** The full width at half maximum of the (110) peak in the XRD spectrum of perovskite films deposited on SnO<sub>2</sub> films with different concentrations of 2-FN.

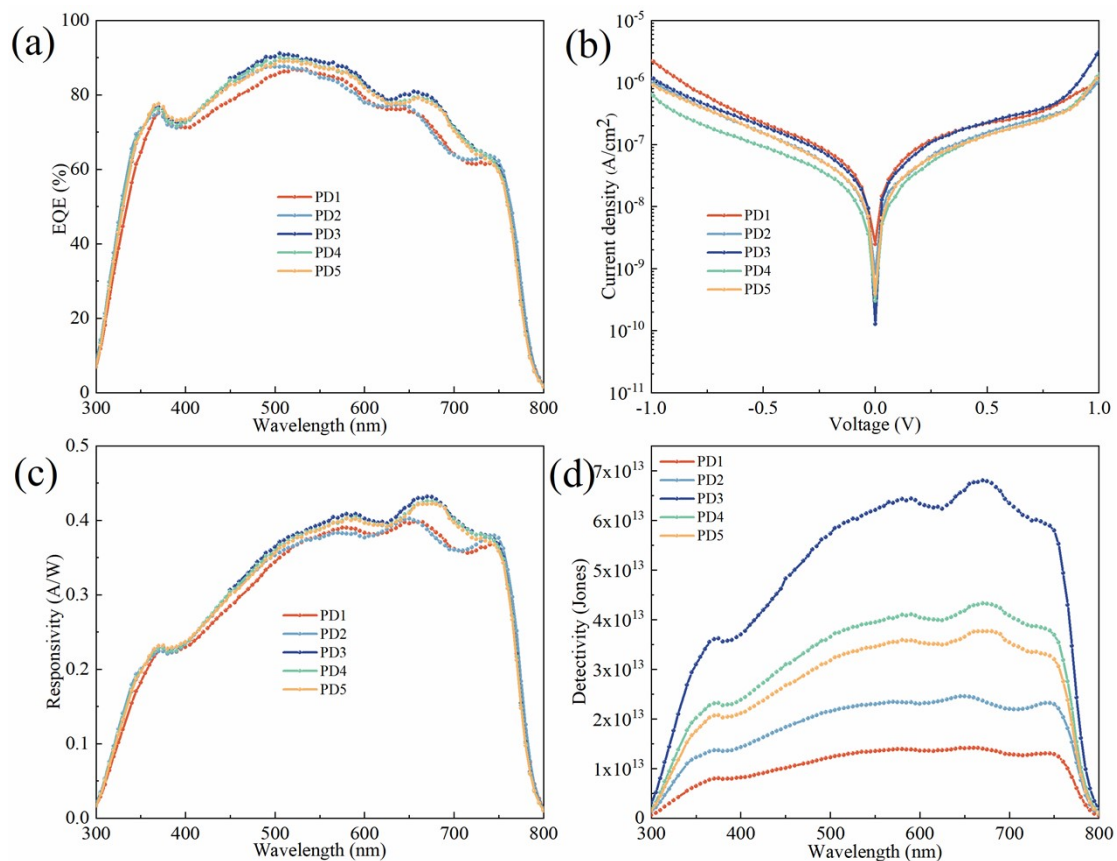

**Fig. S6** (a) EQE response curves for PDs. (b) Dark current density profile of PDs. (c) Responsiveness curves for PDs. (d) Detection rate curves for PDs.

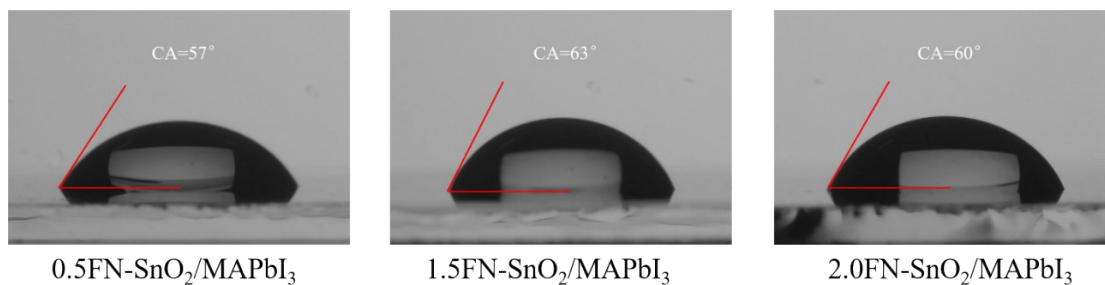

**Fig. S7** Water contact angles of perovskite films deposited on different SnO<sub>2</sub> films.

**Table. S1** Comparison of parameters with previously reported perovskite detectors.

| Device structure                                                                  | R (A/W) | D* (Jones)           | Bias (V) | Detection wavelength (nm) | Testing Equipment/Calibration Standards      | Refs      |
|-----------------------------------------------------------------------------------|---------|----------------------|----------|---------------------------|----------------------------------------------|-----------|
| ITO/SnO <sub>2</sub> (PEAI)/MAPbI <sub>3</sub> /PTAA/Au                           | 0.40    | 2.5×10 <sup>12</sup> | -0.5     | 300-850                   | Zolix SCS600 spectral response test system   | 1         |
| FTO/TiO <sub>2</sub> (ALD)/MAPbI <sub>3</sub> /Spiro-OMeTAD/Au                    | 0.238   | 1.1×10 <sup>13</sup> | 0        | 300-800                   | Si detector S10-14010, Enlitech              | 2         |
| ITO/VOx(Li)/MAPbI <sub>3</sub> /PC <sub>6</sub> <sub>1</sub> BM/BCP/Ag            | 0.47    | 7.4×10 <sup>11</sup> | -0.1     | 300-800                   | Enlitech, QE-R 3018                          | 3         |
| ITO/PEDOT:PSS/MAPbI <sub>3</sub> (ODT)/PC <sub>70</sub> BM/Al                     | 0.366   | 1.4×10 <sup>12</sup> | -0.1     | 350-850                   | Silicon Reference Cell Calibration           | 4         |
| ITO/SnO <sub>2</sub> /MAPbI <sub>3</sub> / Spiro-OMeTAD(RbI)/MoO <sub>3</sub> /Cu | 0.43    | 3.7×10 <sup>13</sup> | 0        | 300-800                   | Standard Monocrystalline Silicon Calibration | 5         |
| FTO/SnO <sub>2</sub> /CsPbI <sub>2</sub> Br(Lanthanide ions)/ Spiro-OMeTAD/Ag     | 0.12    | 4.6×10 <sup>12</sup> | 0        | 300-700                   | Crowntech Qtest Station 1000 AD              | 6         |
| ITO/SnO <sub>2</sub> (2-FN)/MAPbI <sub>3</sub> /Spiro-OMeTAD/MoO <sub>3</sub> /Cu | 0.431   | 6.8×10 <sup>13</sup> | 0        | 300-800                   | Standard Monocrystalline Silicon Calibration | This work |

**Table. S2** Performance parameters of PDs.

| Devices | EQE <sub>max</sub> | J <sub>d</sub> (A cm <sup>-2</sup> ) | R <sub>max</sub> (A/W) | D* <sub>max</sub> (Jones) |
|---------|--------------------|--------------------------------------|------------------------|---------------------------|
| PD1     | 86.92%             | 2.47×10 <sup>-9</sup>                | 0.397                  | 1.41×10 <sup>13</sup>     |
| PD2     | 87.64%             | 8.38×10 <sup>-10</sup>               | 0.402                  | 2.45×10 <sup>13</sup>     |
| PD3     | 91.11%             | 1.26×10 <sup>-10</sup>               | 0.431                  | 6.80×10 <sup>13</sup>     |
| PD4     | 90.05%             | 3.03×10 <sup>-10</sup>               | 0.426                  | 4.30×10 <sup>13</sup>     |
| PD5     | 89.15%             | 3.93×10 <sup>-10</sup>               | 0.422                  | 3.76×10 <sup>13</sup>     |

**Table. S3** Average values and standard deviations of the performance parameters based on 10 PDs.

| Devices | EQE <sub>avg</sub> (%) | J <sub>d avg</sub> (A cm <sup>-2</sup> )       | R <sub>avg</sub> (A/W) | D* <sub>avg</sub> (Jones)                    |
|---------|------------------------|------------------------------------------------|------------------------|----------------------------------------------|
| PD1     | 86.28±1.22             | 5.41×10 <sup>-9</sup> ±3.13×10 <sup>-9</sup>   | 0.410±0.013            | 1.41×10 <sup>13</sup> ±3.07×10 <sup>12</sup> |
| PD2     | 87.46±0.57             | 1.52×10 <sup>-9</sup> ±4.24×10 <sup>-10</sup>  | 0.415±0.008            | 1.95×10 <sup>13</sup> ±3.07×10 <sup>12</sup> |
| PD3     | 89.32±0.97             | 2.55×10 <sup>-10</sup> ±1.06×10 <sup>-10</sup> | 0.420±0.010            | 5.09×10 <sup>13</sup> ±9.72×10 <sup>12</sup> |
| PD4     | 88.80±1.02             | 7.10×10 <sup>-10</sup> ±3.00×10 <sup>-10</sup> | 0.418±0.011            | 3.09×10 <sup>13</sup> ±5.94×10 <sup>12</sup> |
| PD5     | 88.42±0.95             | 9.32×10 <sup>-10</sup> ±3.52×10 <sup>-10</sup> | 0.417±0.003            | 2.63×10 <sup>13</sup> ±4.91×10 <sup>12</sup> |

## References

1. S. L. Wang, M. Y. Li, C. Y. Song, C. L. Zheng, J. T. Li, Z. Y. Li, Y. T. Zhang and J. Q. Yao, *Appl. Surf. Sci.*, 2023, **623**, 9.
2. B. T. Liu, Y. S. Huang, T. H. Wu, S. H. Wang, H. S. Su and I. R. Chen, *J. Taiwan Inst. Chem. Eng.*, 2023, **151**, 7.
3. M. Y. Long, L. H. Yang, D. M. An, J. L. Dai, Y. Y. Wang and X. Yao, *Opt. Mater.*, 2024, **147**, 8.
4. B. G. Kim, J. Y. Chun, Z. Yang, S. Kim, W. Jang and D. H. Wang, *J. Alloy. Compd.*, 2023, **969**, 13.
5. B. T. Liu, Y. Z. Zhang, Y. Y. Zuo and D. Rachmawati, *J. Alloy. Compd.*, 2022, **929**, 10.
6. Z. Y. Fang, N. Ding, W. Xu, T. Y. Wang, Y. Wang, L. Zi, J. H. Hu, S. Y. Lu, D. L. Zhou, X. Bai and H. W. Song, *J. Mater. Chem. C*, 2023, **11**, 5546-5546.
